# Supplementary material
Source: publisher site journal article supplement (https://www.dovepress.com/get_supplementary_file.php?f=315827.docx)
Supplement: Supplementary file 1 [file get_supplementary_file.php]

**Association of short and long interpregnancy intervals with adverse birth outcomes: evidence from a cross-sectional study in Northwest China**

Guoshuai Shi1 Binyan Zhang1 Yijun Kang1 Shaonong Dang1 Hong Yan1,2

1Department of Epidemiology and Biostatistics, School of Public health, Xi’an Jiaotong University Health Science Center, Xi’an, Shaanxi, 710061, China;

2Nutrition and Food Safety Engineering Research Center of Shaanxi Province, Xi’an, Shaanxi, 710061, China

Correspondence: Shaonong Dang, Hong Yan

Department of Epidemiology and Biostatistics, School of Public Health, Xi’an Jiaotong University Health Science Center, Xi’an, Shaanxi, People, Republic of China

Tel +86 29 82655104

Email tjdshn@mail.xjtu.edu.cn (SD), xjtu_yhpaper@126.com (HY)

**Table S1** Association between IPI and adverse pregnancy outcomes depend on childbearing age

|  | <6 | 6-11 | 12-17 | 18-23 | 24-59 | 60-119 | ≥120 |
| --- | --- | --- | --- | --- | --- | --- | --- |
| LBW |  |  |  |  |  |  |  |
| <35 | 1.63 (0.92-2.86) | 1.86 (1.07-3.24) * | 1.08 (0.58-1.99) | Ref. | 0.91 (0.54-1.54) | 1.30 (0.78-2.18) | 1.60 (0.93-2.76) |
| ≥35 | 1.05 (0.51-2.14) | 0.55 (0.22-1.37) | 1.03 (0.48-2.23) | Ref. | 0.98 (0.53-1.83) | 0.86 (0.45-1.64) | 1.45 (0.75-2.82) |
| SGA |  |  |  |  |  |  |  |
| <35 | 1.27 (1.01-1.60) * | 0.99 (0.78-1.27) | 0.95 (0.74-1.22) | Ref. | 0.88 (0.72-1.09) | 0.94 (0.76-1.16) | 1.11 (0.88-1.4) |
| ≥35 | 1.20 (0.85-1.69) | 1.08 (0.75-1.57) | 0.73 (0.48-1.11) | Ref. | 1.02 (0.75-1.39) | 0.91 (0.66-1.25) | 1.12 (0.8-1.58) |
| PTB |  |  |  |  |  |  |  |
| <35 | 1.02 (0.55-1.87) | 1.13 (0.62-2.06) | 1.20 (0.65-2.2) | Ref. | 0.84 (0.50-1.44) | 0.95 (0.55-1.62) | 1.24 (0.69-2.22) |
| ≥35 | 1.34 (0.54-3.33) | 0.56 (0.16-1.89) | 1.31 (0.49-3.48) | Ref. | 1.24 (0.55-2.8) | 1.74 (0.78-3.9) | 3.07 (1.35-6.98) * |
| Birth defects |  |  |  |  |  |  |  |
| <35 | 2.16 (1.11-4.22) * | 2.38 (1.22-4.63) * | 1.51 (0.73-3.11) | Ref. | 1.26 (0.66-2.39) | 1.05 (0.54-2.04) | 0.88 (0.40-1.93) |
| ≥35 | 3.54 (1.22-10.25) * | 1.50 (0.43-5.25) | 2.06 (0.63-6.77) | Ref. | 1.99 (0.71-5.61) | 2.24 (0.79-6.38) | 1.91 (0.61-5.97) |

**Notes:** *P<0.05. The maternal education, residence, family economic status, maternal occupation, passive smoking, folic acid supplement, iron supplement, frequency of antenatal care visits, maternal taking medicine and the infant gender were adjusted for LBW, SGA, PTB and birth defects, respectively.

**Abbreviations:** IPI, interpregnancy interval; Ref., referent groups; LBW, low birth weight; SGA, small for gestational age; PTB, preterm birth.

**Table S2** Association between IPI and adverse pregnancy outcomes depend on iron supplement

|  | <6 | 6-11 | 12-17 | 18-23 | 24-59 | 60-119 | ≥120 |
| --- | --- | --- | --- | --- | --- | --- | --- |
| LBW |  |  |  |  |  |  |  |
| Yes | 0.91 (0.06-14.95) | 0.63 (0.04-9.87) | 1.43 (0.13-15.27) | Ref. | 0.32 (0.03-3.44) | 0.65 (0.08-5.56) | 0.59 (0.05-6.39) |
| No | 1.39 (0.89-2.18) | 1.38 (0.88-2.19) | 1.03 (0.63-1.68) | Ref. | 0.95 (0.63-1.43) | 1.13 (0.75-1.71) | 1.57 (1.02-2.41) * |
| SGA |  |  |  |  |  |  |  |
| Yes | 0.81 (0.23-2.83) | 1.43 (0.46-4.45) | 0.79 (0.23-2.76) | Ref. | 0.74 (0.26-2.11) | 0.97 (0.35-2.72) | 0.78 (0.23-2.60) |
| No | 1.27 (1.05-1.54) * | 1.01 (0.82-1.25) | 0.89 (0.72-1.11) | Ref. | 0.93 (0.78-1.11) | 0.93 (0.78-1.12) | 1.13 (0.93-1.37) |
| PTB |  |  |  |  |  |  |  |
| Yes | 0.24 (0.02-2.57) | 0.33 (0.03-3.46) | 0.24 (0.02-2.75) | Ref. | 0.32 (0.05-1.93) | 0.81 (0.17-3.93) | 1.05 (0.17-6.61) |
| No | 1.18 (0.70-1.98) | 1.07 (0.62-1.85) | 1.32 (0.77-2.24) | Ref. | 1.01 (0.64-1.6) | 1.18 (0.74-1.88) | 1.79 (1.10-2.92) * |
| Birth defects |  |  |  |  |  |  |  |
| Yes | 1.11 (0.14-9.39) | Ref.# | | | | | |
| No | 2.52 (1.43-4.42) * | 2.16 (1.21-3.88) * | 1.56 (0.84-2.91) | Ref. | 1.41 (0.82-2.43) | 1.34 (0.77-2.33) | 1.15 (0.61-2.17) |

**Notes:** *P<0.05. #There was no participants in IPIs of 18-23 and ≥120 months, so IPIs of 6-11, 12-17, 18-23, 24-59, 60-119 and ≥120 months were merged as the reference group. The childbearing age, maternal education, residence, family economic status, maternal occupation, passive smoking, folic acid supplement, frequency of antenatal care visits, maternal taking medicine and the infant gender were adjusted for LBW, SGA, PTB and birth defects, respectively.
